# Supplementary material for: Clinicopathologic, molecular, and prognostic implications of the loss of EPCAM expression in colorectal carcinoma
Source: PubMed Central journal article supplement (PMC4924648; doi:10.18632/oncotarget.5618), 2015-10-30
Supplement: oncotarget-07-13372-s001.pdf [file oncotarget-07-13372-s001.pdf]

SUPPLEMENTARY FIGURE AND TABLE

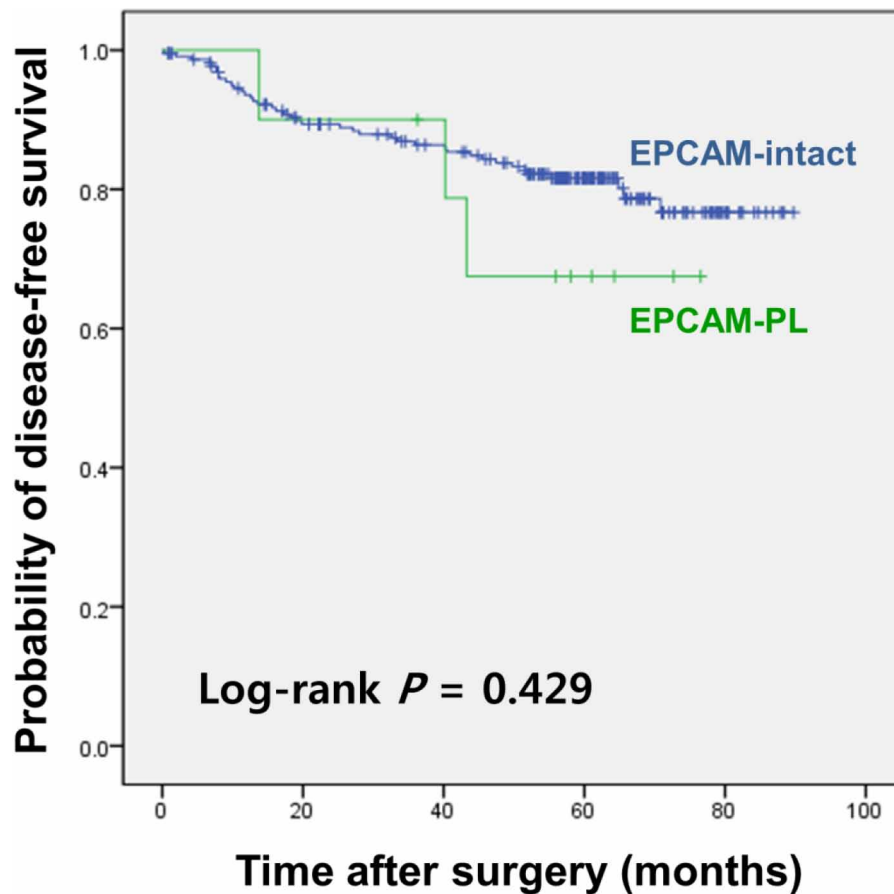

Supplementary Figure S1: Kaplan-Meier survival analysis in stage II CRCs (validation cohort;  $n = 235$ ).

Supplementary Table S1: EPCAM expression status-dependent clinicopathologic and molecular features in stage II CRCs (validation cohort;  $n = 235$ )

| Variables      |                 | Case No. | EPCAM-PL<br>( $n = 10$ ) | EPCAM-intact<br>( $n = 225$ ) | $P$ -value |
|----------------|-----------------|----------|--------------------------|-------------------------------|------------|
| Age            | <60 years       | 87       | 5 (50%)                  | 82 (36%)                      | 0.506      |
|                | $\geq 60$ years | 148      | 5 (50%)                  | 143 (64%)                     |            |
| Gender         | Male            | 138      | 3 (30%)                  | 135 (60%)                     | 0.097      |
|                | Female          | 97       | 7 (70%)                  | 90 (40%)                      |            |
| Tumor location | Proximal        | 80       | 5 (50%)                  | 75 (33%)                      | 0.311      |
|                | Distal          | 120      | 5 (50%)                  | 115 (51%)                     |            |
|                | Rectum          | 35       | 0 (0%)                   | 35 (16%)                      |            |

(Continued)

| Variables                        |                   | Case No. | EPCAM-PL<br>(n = 10) | EPCAM-intact<br>(n = 225) | P-value |
|----------------------------------|-------------------|----------|----------------------|---------------------------|---------|
| Gross tumor type                 | Fungating         | 163      | 5 (50%)              | 158 (70%)                 | 0.18    |
|                                  | Infiltrative      | 72       | 5 (50%)              | 67 (30%)                  |         |
| Tumor differentiation            | WD/MD             | 234      | 10 (100%)            | 224 (100%)                | 1       |
|                                  | PD                | 1        | 0 (0%)               | 1 (0%)                    |         |
| Mucinous histology               | Absent            | 206      | 9 (90%)              | 197 (88%)                 | 1       |
|                                  | Present           | 29       | 1 (10%)              | 28 (12%)                  |         |
| Signet ring cell histology       | Absent            | 235      | 10 (100%)            | 225 (100%)                | NA      |
|                                  | Present           | 0        | 0 (0%)               | 0 (0%)                    |         |
| Medullary histology              | Absent            | 233      | 10 (100%)            | 223 (100%)                | 1       |
|                                  | Present           | 1        | 0 (0%)               | 1 (0%)                    |         |
| Serrated histology               | Absent            | 225      | 8 (80%)              | 217 (96%)                 | 0.061   |
|                                  | Present           | 10       | 2 (20%)              | 8 (4%)                    |         |
| Lymphovascular invasion          | Absent            | 179      | 4 (40%)              | 175 (78%)                 | 0.014   |
|                                  | Present           | 56       | 6 (60%)              | 50 (22%)                  |         |
| Perineural invasion              | Absent            | 203      | 7 (70%)              | 196 (87%)                 | 0.141   |
|                                  | Present           | 32       | 3 (30%)              | 29 (13%)                  |         |
| Tumor budding                    | Absent            | 86       | 3 (30%)              | 83 (37%)                  | 0.75    |
|                                  | Present           | 149      | 7 (70%)              | 142 (63%)                 |         |
| MSI status                       | MSI-high          | 29       | 2 (20%)              | 27 (12%)                  | 0.356   |
|                                  | MSI-low/MSS       | 206      | 8 (80%)              | 198 (88%)                 |         |
| CIMP status                      | CIMP-high         | 12       | 0 (0%)               | 12 (5%)                   | 1       |
|                                  | CIMP-low/negative | 223      | 10 (100%)            | 213 (95%)                 |         |
| <i>MLH1</i> promoter methylation | Methylated        | 9        | 0 (0%)               | 9 (4%)                    | 1       |
|                                  | Unmethylated      | 226      | 10 (100%)            | 216 (96%)                 |         |
| <i>KRAS</i> mutation             | Mutant            | 65       | 3 (33%)              | 62 (29%)                  | 0.72    |
|                                  | Wild type         | 160      | 6 (67%)              | 154 (71%)                 |         |
| <i>BRAF</i> mutation             | Mutant            | 14       | 2 (20%)              | 12 (5%)                   | 0.114   |
|                                  | Wild type         | 219      | 8 (80%)              | 211 (95%)                 |         |

EPCAM-PL, partial loss of EPCAM expression; EPCAM-intact, intact EPCAM expression; WD, well differentiated; MD, moderately differentiated; PD, poorly differentiated; NA, not applicable; MSI, microsatellite instability; MSS, microsatellite stable; CIMP, CpG island methylator phenotype
